# Supplementary material for: Preparation and characterization of Au nanoparticles capped with mercaptocarboranyl clusters
Source: Royal Society of Chemistry journal article supplement (doi:10.1039/c3dt52872c), 2013-11-16

## SUPPLEMENTARY INFORMATION

### Preparation and characterization of Au nanoparticles capped with mercaptocarboranyl clusters

Ana Cioran,<sup>a</sup> Francesc Teixidor,<sup>a</sup> Željka Krpetić,<sup>b</sup> Mathias Brust,<sup>b</sup> and Clara Viñas\*<sup>a</sup>

<sup>a</sup> Institut de Ciència de Materials de Barcelona, Campus U.A.B. 08193 Bellaterra, Spain.

<sup>b</sup> Department of Chemistry, Crown Street, University of Liverpool, Liverpool L69 7ZD, United Kingdom.

### Table of contents

- Figure S1.**  $^{11}\text{B}\{^1\text{H}\}$ -NMR spectrum (recorded in  $d_6$ -acetone) of MPCs modified with ligand **1**.
- Figure S2.**  $^{11}\text{B}$ -NMR spectrum (recorded in  $d_6$ -acetone) of MPCs modified with ligand **1**.
- Figure S3.**  $^{11}\text{B}\{^1\text{H}\}$ -NMR spectrum (recorded in  $d_6$ -acetone) of MPCs modified with ligand **2**.
- Figure S4.**  $^{11}\text{B}\{^1\text{H}\}$ -NMR spectrum (recorded in  $d_6$ -acetone) of MPCs modified with ligand **3**.
- Figure S5.**  $^{11}\text{B}$ -NMR spectrum (recorded in  $d_6$ -acetone) of MPCs modified with ligand **3**.
- Figure S6.**  $^{11}\text{B}\{^1\text{H}\}$ -NMR spectrum (recorded in  $d_6$ -acetone) of MPCs modified with ligand **5**.
- Figure S7.**  $^{11}\text{B}$ -NMR spectrum (recorded in  $d_6$ -acetone) of MPCs modified with ligand **5**.
- Figure S8.** FTIR for compound **5**.
- Figure S9.** FTIR of 3 nm MPCs capped with mercaptocarborane (1-SH-2-Me-1,2-*closo*- $\text{C}_2\text{B}_{10}\text{H}_{10}$ ), ligand **1** (1-SH-2-Ph-1,2-*closo*- $\text{C}_2\text{B}_{10}\text{H}_{10}$ ), ligand **2** (1,2-(SH)<sub>2</sub>-1,2-*closo*- $\text{C}_2\text{B}_{10}\text{H}_{10}$ ), ligand **3** (1-SH(CH<sub>2</sub>)<sub>2</sub>-2-Me-1,2-*closo*- $\text{C}_2\text{B}_{10}\text{H}_{10}$ ) and ligand **5** (1-SH(CH<sub>2</sub>)<sub>3</sub>-2-Me-1,2-*closo*- $\text{C}_2\text{B}_{10}\text{H}_{10}$ ).
- Figure S10.** FTIR spectra of ligand **2** (black) and its corresponding 10 nm MPCs (red).
- Figure S11.** FTIR spectra of ligand **3** (black) and its corresponding 10 nm MPCs (red).

**Figure S1.**  $^{11}\text{B}\{^1\text{H}\}$ -NMR spectrum (recorded in  $\text{d}_6$ -acetone) of MPCs modified with ligand **1**.

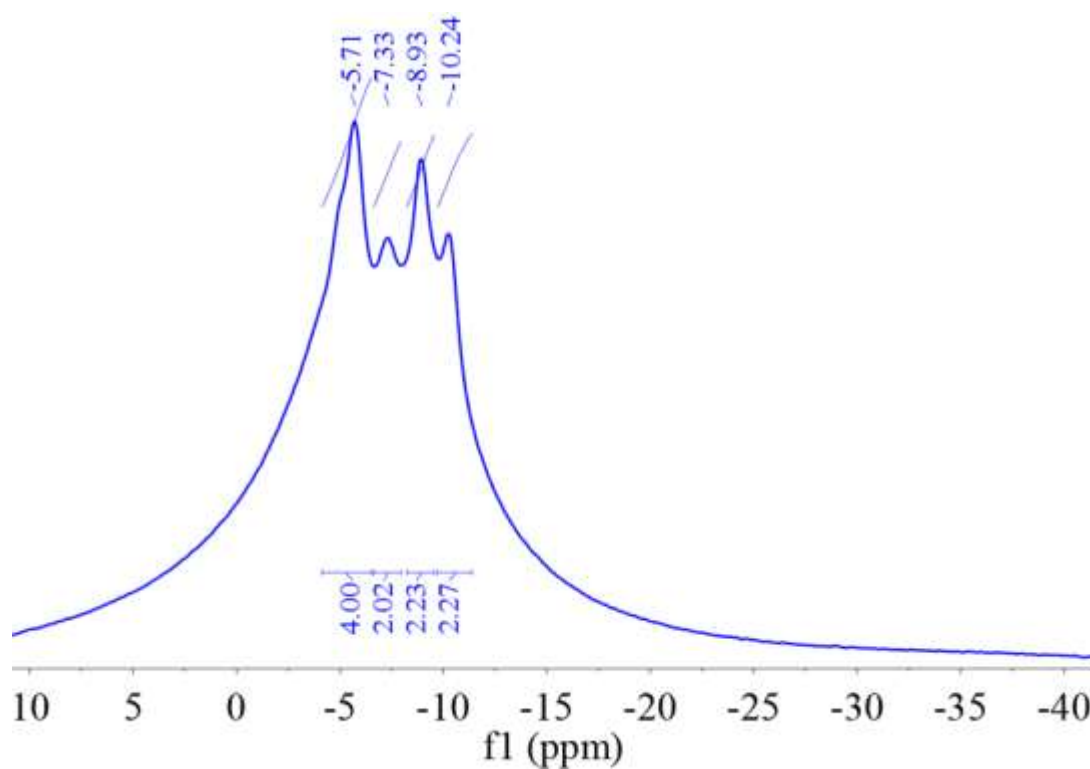

**Figure S2.**  $^{11}\text{B}$ -NMR spectrum (recorded in  $\text{d}_6$ -acetone) of MPCs modified with ligand **1**.

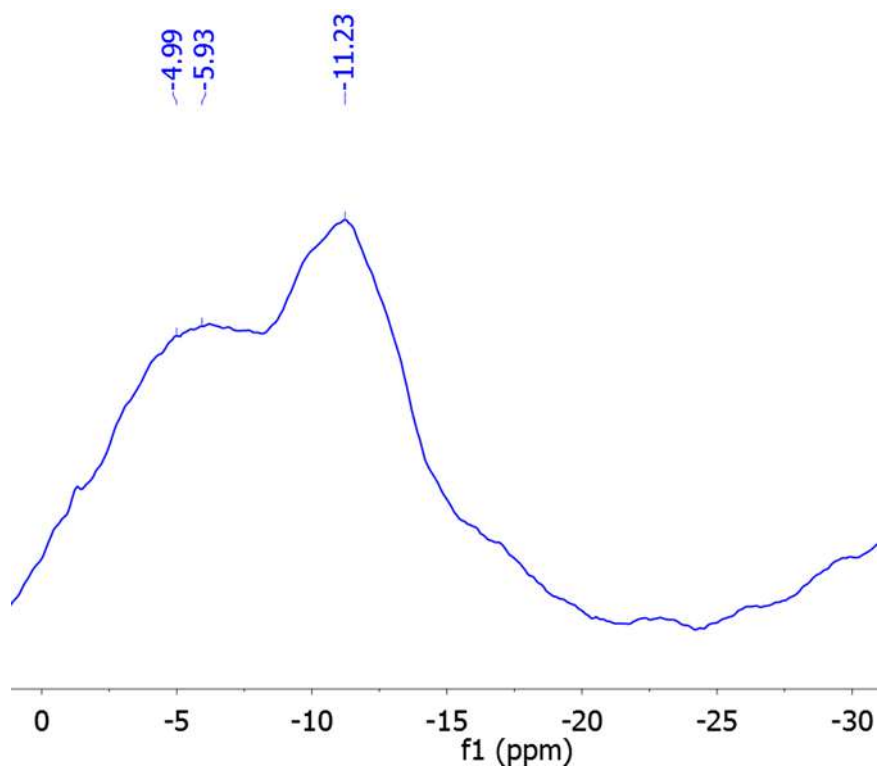

**Figure S3.**  $^{11}\text{B}\{^1\text{H}\}$ -NMR spectrum (recorded in  $\text{d}_6$ -acetone) of MPCs modified with ligand **2**.

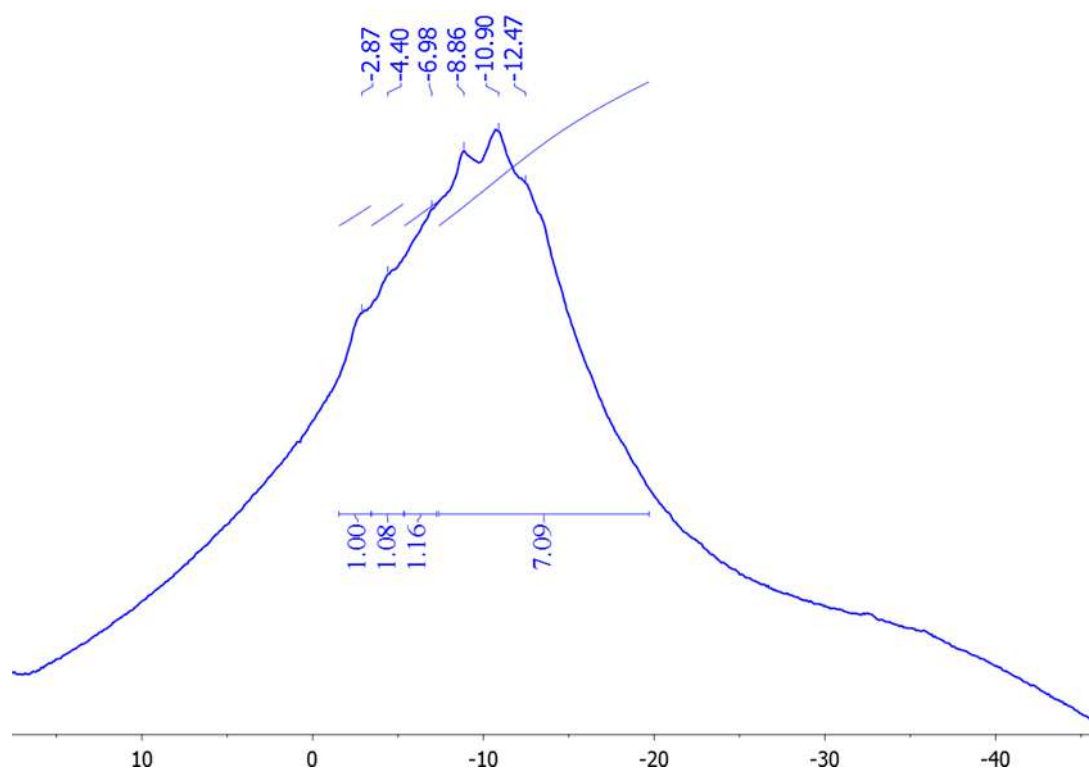

**Figure S4.**  $^{11}\text{B}\{^1\text{H}\}$ -NMR spectrum (recorded in  $\text{d}_6$ -acetone) of MPCs modified with ligand **3**.

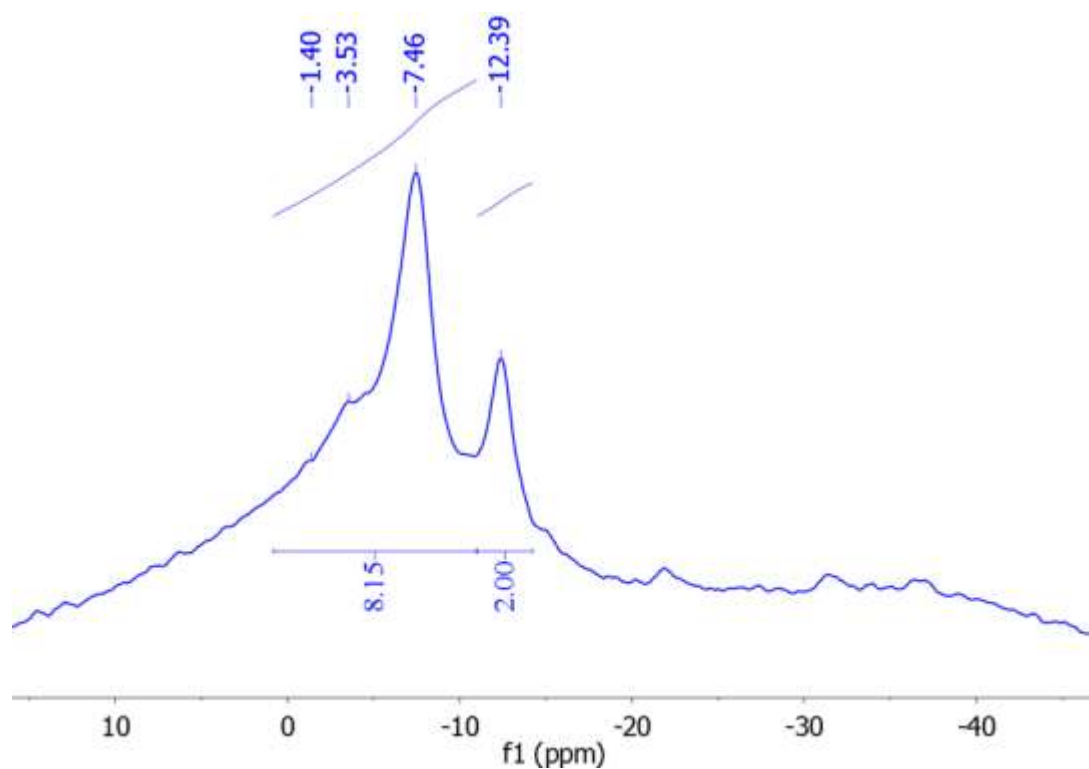

**Figure S5.**  $^{11}\text{B}$ -NMR spectrum (recorded in  $\text{d}_6$ -acetone) of MPCs modified with ligand **3**.

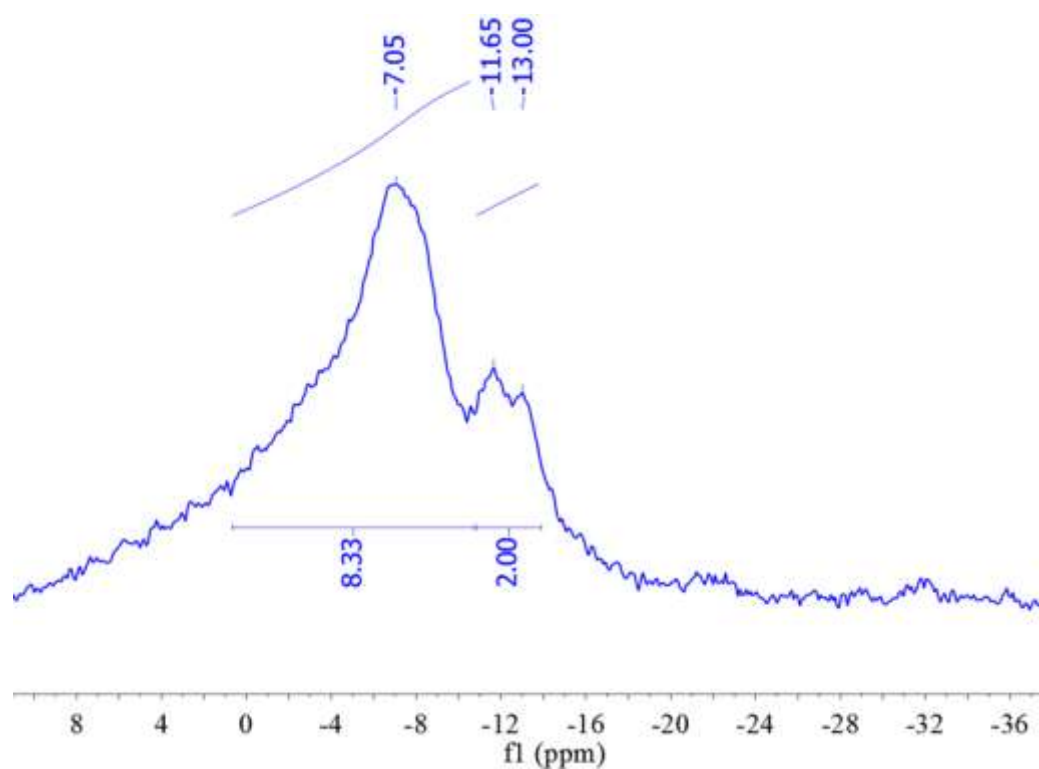

**Figure S6.**  $^{11}\text{B}\{^1\text{H}\}$ -NMR spectrum (recorded in  $\text{d}_6$ -acetone) of MPCs modified with ligand **5**.

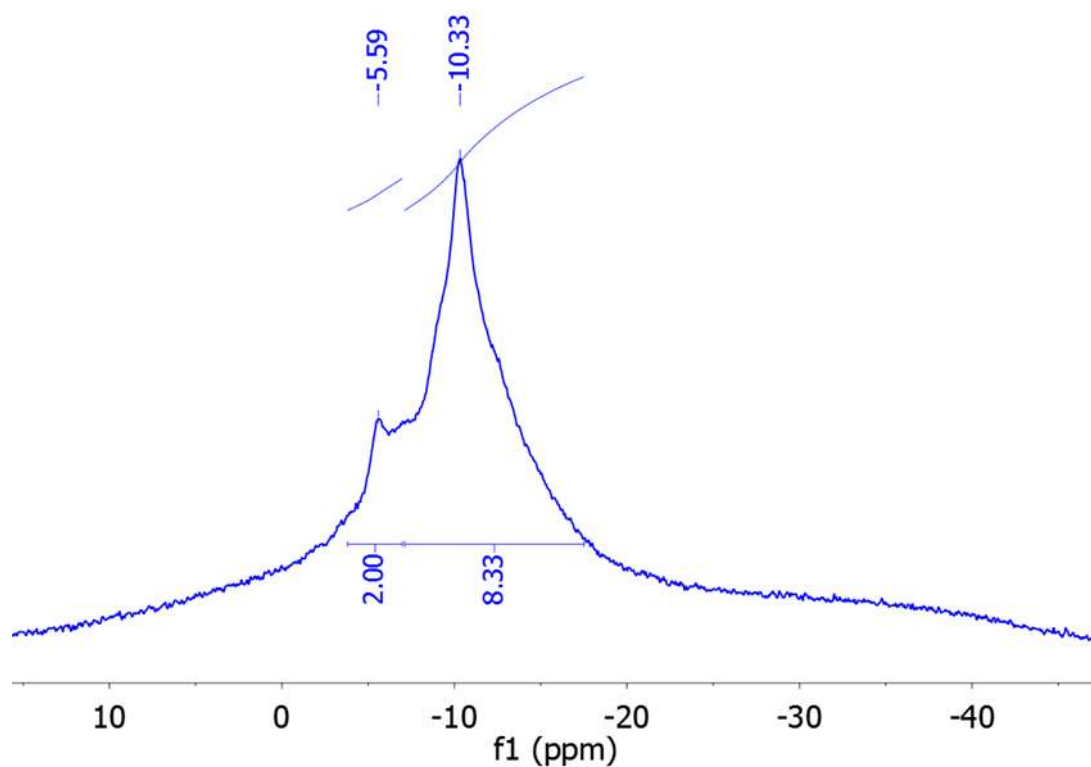

**Figure S7.**  $^{11}\text{B}$ -NMR spectrum (recorded in  $\text{d}_6$ -acetone) of MPCs modified with ligand **5**.

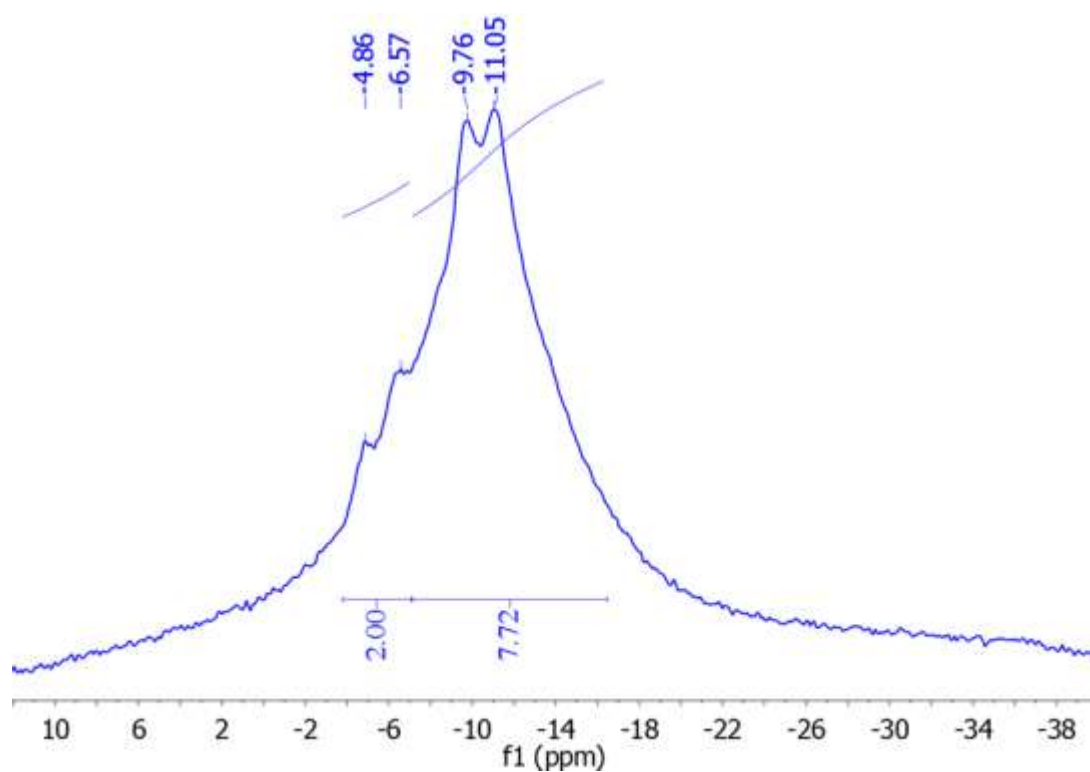

**Figure S8.** FTIR for compound **5**.

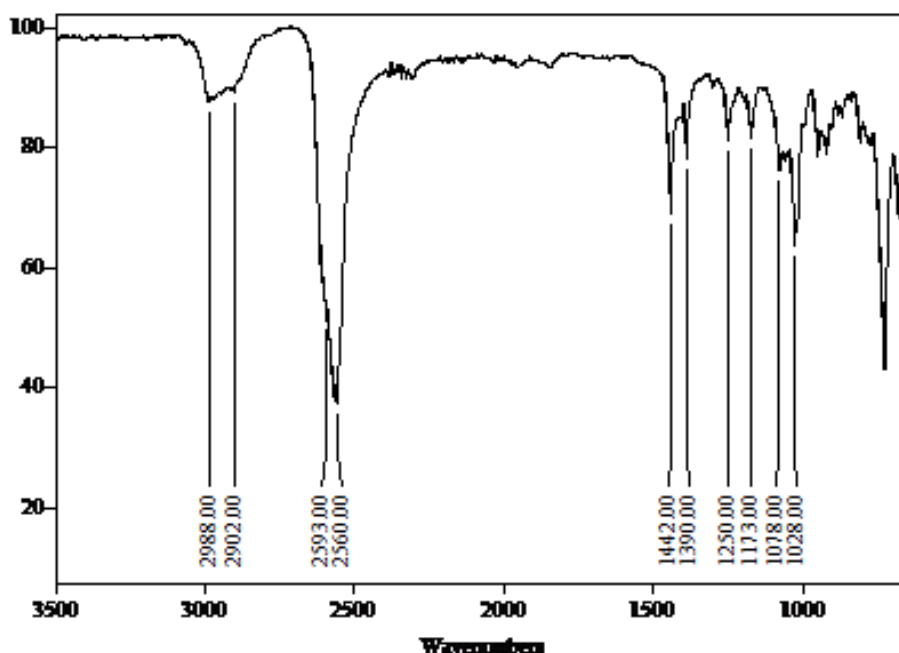

**Figure S9.** FTIR of 3 nm MPCs capped with mercaptocarborane (1-SH-2-Me-1,2-*closo*-C<sub>2</sub>B<sub>10</sub>H<sub>10</sub>), ligand **1** (1-SH-2-Ph-1,2-*closo*-C<sub>2</sub>B<sub>10</sub>H<sub>10</sub>), ligand **2** (1,2-(SH)<sub>2</sub>-1,2-*closo*-C<sub>2</sub>B<sub>10</sub>H<sub>10</sub>), ligand **3** (1-SH(CH<sub>2</sub>)<sub>2</sub>-2-Me-1,2-*closo*-C<sub>2</sub>B<sub>10</sub>H<sub>10</sub>) and ligand **5** (1-SH(CH<sub>2</sub>)<sub>3</sub>-2-Me-1,2-*closo*-C<sub>2</sub>B<sub>10</sub>H<sub>10</sub>).

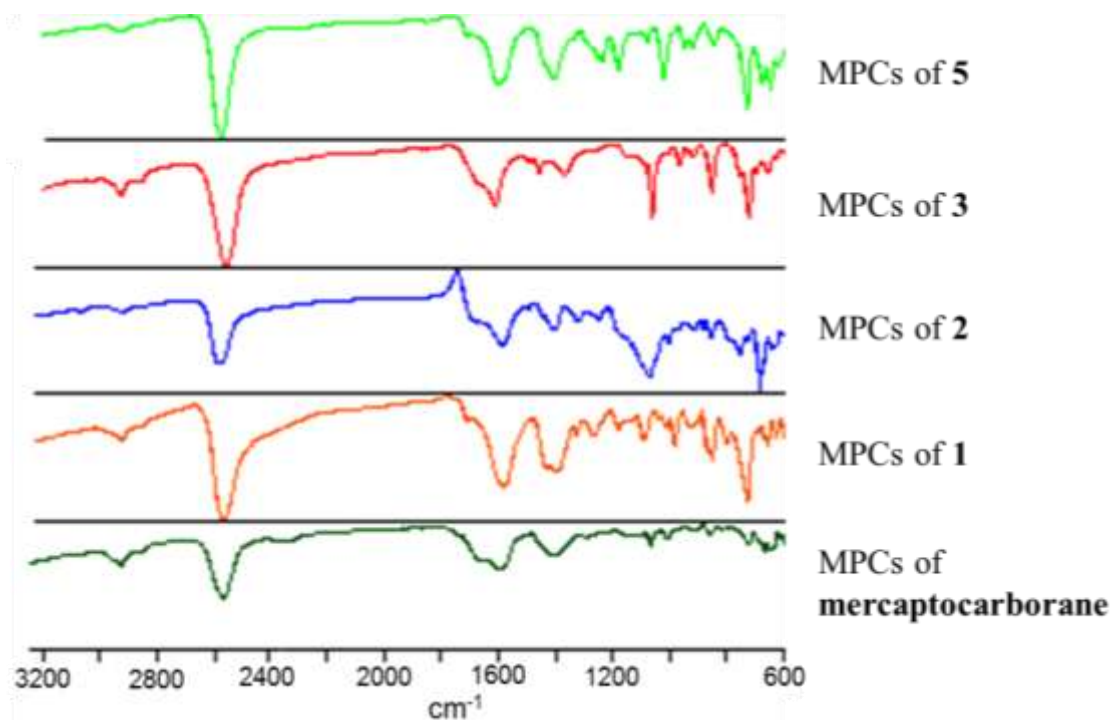

**Figure S10.** FTIR spectra of ligand **2** (black) and its corresponding 10 nm MPCs (red).

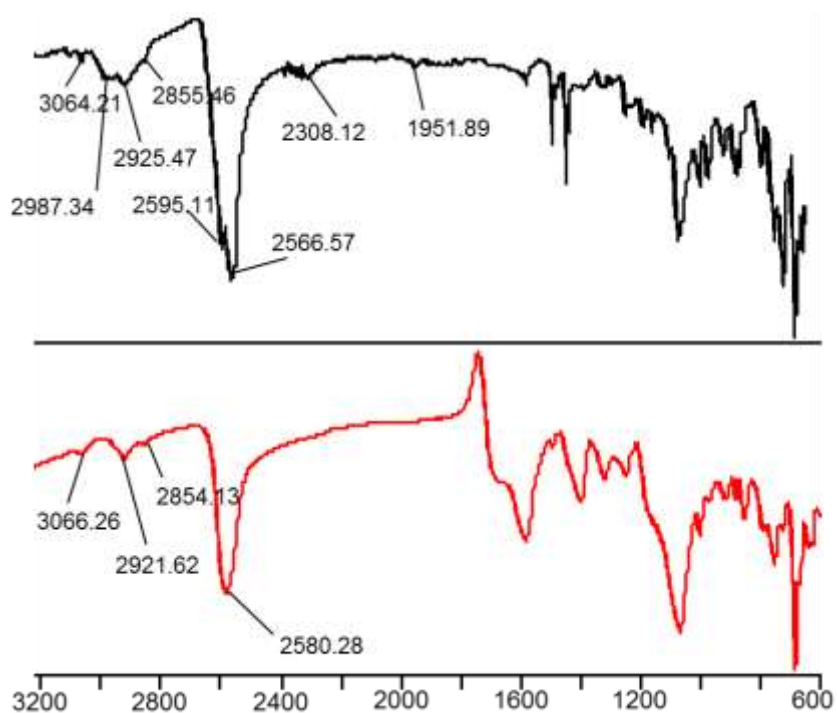

**Figure S11.** FTIR spectra of ligand **3** (black) and its corresponding 10 nm MPCs (red).

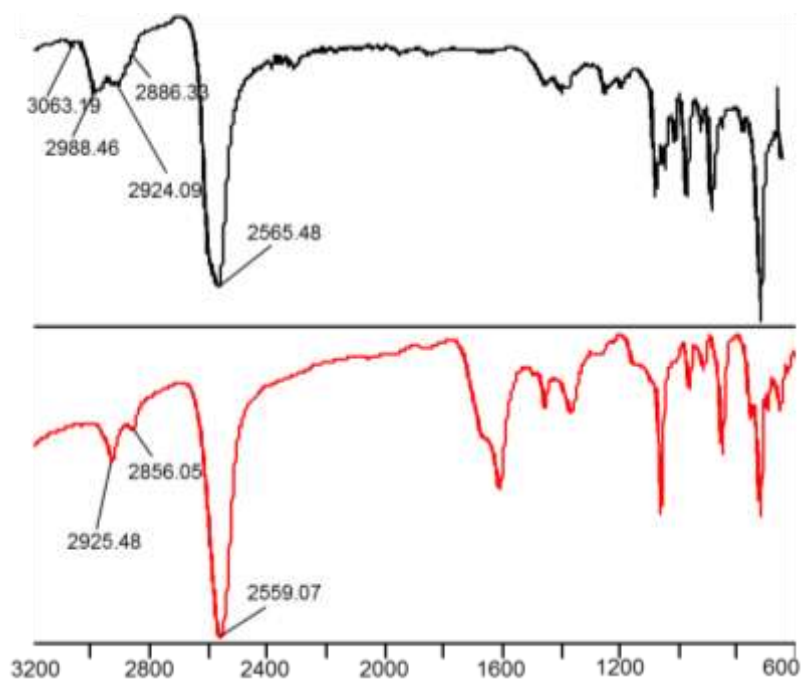

Supplement: c3dt52872c.pdf [file c3dt52872c.pdf]
